# Supplementary material for: Preoperative Midazolam and Patient-Centered Outcomes of Older Patients: The I-PROMOTE Randomized Clinical Trial
Source: PubMed Central journal article supplement (PMC10733850; doi:10.1001/jamasurg.2023.6479), 2023-12-20
Supplement: jamasurg-e236479-s004.pdf [file jamasurg-e236479-s004.pdf]

\*Indicates required information. Only first name, last name, and suffix will appear in PubMed.

| <b>*Group Name(s): I-PROMOTE Study Group</b> |                   |                              |                  |                                                                                                                                                       |                                          |                                                         |                                                                                            |
|----------------------------------------------|-------------------|------------------------------|------------------|-------------------------------------------------------------------------------------------------------------------------------------------------------|------------------------------------------|---------------------------------------------------------|--------------------------------------------------------------------------------------------|
| <b>*First Name and Middle Initial(s)</b>     | <b>*Last Name</b> | <b>*Suffix (eg, Jr, III)</b> | Academic Degrees | Institution                                                                                                                                           | Location (city, state/province, country) | Role or Contribution, eg, chair, principal investigator | Group (if more than 1 Group listed in the byline) and/or Subgroup (eg, Steering Committee) |
| Andres                                       | Brenes            |                              | MD               | Department of Anesthesiology an                                                                                                                       | Munich, Germany                          | sub-investigator                                        |                                                                                            |
| Leonie                                       | Ernst             |                              | MD               | Department of Anesthesiology an                                                                                                                       | Munich, Germany                          | sub-investigator                                        |                                                                                            |
| Pia                                          | Feddersen         |                              | MD               | Department of Anesthesiology an                                                                                                                       | Munich, Germany                          | sub-investigator                                        |                                                                                            |
| Barbara                                      | Kapfer            |                              | MD               | Department of Anesthesiology an                                                                                                                       | Munich, Germany                          | sub-investigator                                        |                                                                                            |
| Susanne                                      | Maluche           |                              | MD               | Department of Anesthesiology an                                                                                                                       | Munich, Germany                          | sub-investigator                                        |                                                                                            |
| Ellis                                        | Muggleton         |                              | MD               | Department of Anesthesiology an                                                                                                                       | Munich, Germany                          | sub-investigator                                        |                                                                                            |
| Michael                                      | Schneider         |                              | MD               | Department of Anesthesiology an                                                                                                                       | Munich, Germany                          | sub-investigator                                        |                                                                                            |
| Linda                                        | Grüßer            |                              | MD               | Department of Anesthesiology, M                                                                                                                       | Aachen, Germany                          | sub-investigator                                        |                                                                                            |
| Julia                                        | Wallqvist         |                              | MD               | Department of Anesthesiology, M                                                                                                                       | Aachen, Germany                          | sub-investigator                                        |                                                                                            |
| Anna                                         | Heusel            |                              | MD               | Department for Anesthesiology, Intensive Care, Emergency Medicine, Pain Therapy and Palliative Care, Kreiskliniken Reutlingen                         | Reutlingen, Germany                      | sub-investigator                                        |                                                                                            |
| Simon                                        | Diepold           |                              | MD               | Department for Anesthesiology, Intensive Care, Emergency Medicine, Pain Therapy and Palliative Care, Kreiskliniken Reutlingen                         | Reutlingen, Germany                      | sub-investigator                                        |                                                                                            |
| Christopher                                  | Rex               |                              | MD               | Department for Anesthesiology, Intensive Care, Emergency Medicine, Pain Therapy and Palliative Care, Kreiskliniken Reutlingen                         | Reutlingen, Germany                      | sub-investigator                                        |                                                                                            |
| Carla                                        | Grundmann         |                              | MD               | Department of Anesthesiology, Surgical Intensive Care, Pain and Palliative Care, Marien Hospital Herne, University Hospital of Ruhr University Bochum | Herne, Germany                           | sub-investigator                                        |                                                                                            |

## Supplemental Online Content: Nonauthor Collaborators

\*Indicates required information. Only first name, last name, and suffix will appear in PubMed.

| *First Name and Middle Initial(s) | *Last Name   | *Suffix (eg, Jr, III) | Academic Degrees | Institution                                                                                                                                           | Location (city, state/province, country) | Role or Contribution, eg, chair, principal investigator | Group (if more than 1 Group listed in the byline) and/or Subgroup (eg, Steering Committee) |
|-----------------------------------|--------------|-----------------------|------------------|-------------------------------------------------------------------------------------------------------------------------------------------------------|------------------------------------------|---------------------------------------------------------|--------------------------------------------------------------------------------------------|
| Jan                               | Wischerhmann |                       | MD               | Department of Anesthesiology, Surgical Intensive Care, Pain and Palliative Care, Marien Hospital Herne, University Hospital of Ruhr University Bochum | Herne, Germany                           | sub-investigator                                        |                                                                                            |
| Louise                            | Fingerhut    |                       | MD               | Department of Anesthesiology and Intensive Care Medicine, University Hospital Bonn                                                                    | Bonn, Germany                            | sub-investigator                                        |                                                                                            |
| Claudia                           | Neumann      |                       | MD               | Department of Anesthesiology and Intensive Care Medicine, University Hospital Bonn                                                                    | Bonn, Germany                            | sub-investigator                                        |                                                                                            |
| Vera                              | Guttenthaler |                       | MD               | Department of Anesthesiology and Intensive Care Medicine, University Hospital Bonn                                                                    | Bonn, Germany                            | sub-investigator                                        |                                                                                            |
| Josef                             | Briegel      |                       | MD               | Department of Anesthesiology, University Hospital, LMU Munich                                                                                         | Munich, Germany                          | sub-investigator                                        |                                                                                            |
| Patrick                           | Möhnle       |                       | MD               | Department of Anesthesiology, University Hospital, LMU Munich                                                                                         | Munich, Germany                          | sub-investigator                                        |                                                                                            |
| Catharina                         | Lampert      |                       | MD               | Department of Anesthesiology, University Hospital, LMU Munich                                                                                         | Munich, Germany                          | sub-investigator                                        |                                                                                            |
| Tanja                             | Sulot        |                       | MD               | Department of Anaesthesiology, University Hospital Düsseldorf                                                                                         | Düsseldorf, Germany                      | sub-investigator                                        |                                                                                            |
