# Supplementary material for: Preoperative Midazolam and Patient-Centered Outcomes of Older Patients: The I-PROMOTE Randomized Clinical Trial
Source: PubMed Central journal article supplement (PMC10733850; doi:10.1001/jamasurg.2023.6479), 2023-12-20
Supplement: jamasurg-e236479-s005.pdf [file jamasurg-e236479-s005.pdf]

## Data Sharing Statement

Kowark. Preoperative Midazolam and Patient-Centered Outcomes of Older Patients. *JAMA Surg.* Published December 20, 2023. doi:10.1001/jamasurg.2023.6479

### Data

**Data available:** Yes

**Data types:** Deidentified participant data, Data dictionary

**How to access data:** Data will be made available upon approval of formal request (methodologically sound proposal including a detailed description of the study objectives, a statistical analysis plan, and a predefined analysis and publication timeline) to the corresponding author. Additional materials might also be required during the process of assessment. The request shall be sent to the corresponding author Prof. Mark Coburn, email address: [mark.coburn@ukbonn.de](mailto:mark.coburn@ukbonn.de)

**When available:** With publication

### Supporting Documents

**Document types:** Statistical/analytic code

**How to access documents:** The statistical / analytic code is included in the Trial Statistical Analysis Plan within the Supplementary data of the manuscript.

**When available:** With publication

### Additional Information

**Who can access the data:** Researchers who provide a methodologically sound proposal to achieve aims in the approved proposal

**Types of analyses:** Specified purposes only

**Mechanisms of data availability:** With signed data access agreement.

**Any additional restrictions:** N/A.
